# Supplementary material for: Effects of the Expressions and Variants of the CAST Gene on the Fatty Acid Composition of the Longissimus Thoracis Muscle of Grazing Sonid Sheep
Source: MDPI journal article supplement (doi:10.3390/ani13020195), 2023-01-04
Supplement: s1 [file s1]

**Table S1.** Descriptive statistics for the studied traits in longissimus thoracis with the number of considered Sonid sheep, the mean value, and the standard deviation (SD).

| Trait                               | Nomenclature | N   | Mean  | SD    |
|-------------------------------------|--------------|-----|-------|-------|
| Butyric acid                        | C4:0         | 378 | 1.86  | 0.84  |
| Caproic acid                        | C6:0         | 378 | 0.79  | 0.52  |
| Capric acid                         | C10:0        | 378 | 0.32  | 0.13  |
| Undecanoic acid                     | C11:0        | 378 | 0.46  | 0.19  |
| Lauric acid                         | C12:0        | 378 | 0.49  | 0.31  |
| Tridecanoic acid                    | C13:0        | 378 | 0.63  | 0.39  |
| Myristic acid                       | C14:0        | 378 | 1.49  | 0.60  |
| Pentadecanoic acid                  | C15:0        | 378 | 0.77  | 0.36  |
| Palmitic acid                       | C16:0        | 378 | 16.85 | 3.43  |
| Heptadecanoic acid                  | C17:0        | 378 | 0.70  | 0.88  |
| Stearic acid                        | C18:0        | 378 | 9.05  | 1.96  |
| Heneicosylic acid                   | C21:0        | 378 | 0.58  | 0.53  |
| Behenic acid                        | C22:0        | 378 | 0.66  | 0.20  |
| Tricosanoic acid                    | C23:0        | 378 | 0.56  | 0.19  |
| Tetracosanoic acid                  | C24:0        | 378 | 0.53  | 0.22  |
| Saturated fatty acid                | SFA          | 378 | 35.74 | 5.24  |
| Myristoleic acid                    | C14:1        | 378 | 0.72  | 0.94  |
| Palmitoleic acid                    | C16:1        | 378 | 0.92  | 1.08  |
| Ginkgolic acid                      | C17:1        | 378 | 0.75  | 0.41  |
| Elaidic acid                        | C18:1n9t     | 378 | 1.85  | 1.44  |
| Oleic acid                          | C18:1n9c     | 378 | 15.82 | 4.36  |
| Eicosenoic acid                     | C20:1n9      | 378 | 0.70  | 0.18  |
| Erucic acid                         | C22:1n9      | 378 | 0.57  | 0.25  |
| Monounsaturated fatty acid          | MUFA         | 378 | 21.34 | 4.89  |
| Linoleic acid                       | C18:2n6c     | 378 | 4.49  | 1.18  |
| $\alpha$ -Linolenic acid            | C18:3n3      | 378 | 1.69  | 0.63  |
| dihomo- $\gamma$ -linolenic acid    | C20:3n6      | 378 | 0.45  | 0.16  |
| Arachidonic acid                    | C20:4n6      | 378 | 0.54  | 0.36  |
| Eicosapentaenoic acid               | C20:5n3      | 378 | 0.55  | 0.24  |
| Docosahexaenoic acid                | C22:6n3      | 378 | 0.43  | 0.12  |
| Polyunsaturated fatty acid          | PUFA         | 378 | 8.16  | 2.23  |
| Unsaturated fatty acid              | UFA          | 378 | 29.50 | 6.00  |
| MUFA/SFA                            | MUFA/SFA     | 378 | 0.60  | 0.13  |
| PUFA/SFA                            | PUFA/SFA     | 378 | 0.23  | 0.07  |
| UFA/SFA                             | UFA/SFA      | 378 | 0.83  | 0.15  |
| Short chain fatty acid              | SCFA         | 378 | 1.86  | 0.84  |
| Medium chain fatty acid             | MCFA         | 378 | 2.05  | 0.56  |
| Long chain fatty acid               | LCFA         | 378 | 61.32 | 10.36 |
| Omega 6 Polyunsaturated fatty acids | n-6          | 378 | 5.48  | 1.44  |
| Omega 3 Polyunsaturated fatty acids | n-3          | 378 | 2.67  | 0.89  |
| n-6/n-3                             | n-6/n-3      | 378 | 2.06  | 4.16  |

|                      |     |     |      |      |
|----------------------|-----|-----|------|------|
| Essential fatty acid | EFA | 378 | 8.16 | 2.23 |
|----------------------|-----|-----|------|------|

Note: N: number of samples. Mean: mean value. SD: standard deviation.
