# Supplementary material for: Effects of the Expressions and Variants of the CAST Gene on the Fatty Acid Composition of the Longissimus Thoracis Muscle of Grazing Sonid Sheep
Source: MDPI journal article supplement (doi:10.3390/ani13020195), 2023-01-04
Supplement: s1 [file s1]

**Table S5.** Linkage disequilibrium as measured by  $D'$  and  $r^2$  among four mutations in the *CAST*.

| SNPs      | c.646G>C                 | c.1210C>T                | c.1437G>A                |
|-----------|--------------------------|--------------------------|--------------------------|
| c.1210C>T | $D' = 1.000/r^2 = 0.639$ |                          |                          |
| c.1437G>A | $D' = 1.000/r^2 = 0.964$ | $D' = 1.000/r^2 = 0.663$ |                          |
| c.2097C>T | $D' = 0.799/r^2 = 0.639$ | $D' = 0.771/r^2 = 0.380$ | $D' = 0.797/r^2 = 0.613$ |
