# Supplementary material for: Effects of the Expressions and Variants of the CAST Gene on the Fatty Acid Composition of the Longissimus Thoracis Muscle of Grazing Sonid Sheep
Source: MDPI journal article supplement (doi:10.3390/ani13020195), 2023-01-04
Supplement: s1 [file s1]

**Table S4.** Genotypic frequencies, allelic frequencies, and diversity parameters of four mutations in *CAST* of Sonid population.

| SNPs              | Genotype frequency |       |       | Allele frequency |       | Diversity parameter |                |                |       |                              |
|-------------------|--------------------|-------|-------|------------------|-------|---------------------|----------------|----------------|-------|------------------------------|
|                   |                    |       |       |                  |       | H <sub>o</sub>      | H <sub>e</sub> | n <sub>e</sub> | PIC   | $\chi^2$ (HWE <sup>2</sup> ) |
| c.646G>C (G216R)  | GG                 | GC    | CC    | G                | C     |                     |                |                |       |                              |
|                   | 0.770              | 0.214 | 0.016 | 0.877            | 0.123 | 0.784               | 0.216          | 1.275          | 0.192 | 0.018                        |
| c.1210C>T (R404C) | CC                 | CT    | TT    | C                | T     |                     |                |                |       |                              |
|                   | 0.669              | 0.302 | 0.029 | 0.820            | 0.180 | 0.705               | 0.295          | 1.419          | 0.252 | 0.185                        |
| c.1437G>A (479T)  | GG                 | GA    | AA    | G                | A     |                     |                |                |       |                              |
|                   | 0.762              | 0.222 | 0.016 | 0.873            | 0.127 | 0.778               | 0.222          | 1.285          | 0.197 | 0.002                        |
| c.2097C>T (699G)  | CC                 | CT    | TT    | C                | T     |                     |                |                |       |                              |
|                   | 0.759              | 0.235 | 0.005 | 0.877            | 0.123 | 0.784               | 0.216          | 1.275          | 0.192 | 3.146                        |

Note: H<sub>o</sub>: observed heterozygosity, H<sub>e</sub>: expected heterozygosity, n<sub>e</sub>: effective allele numbers, PIC: polymorphism information content, HWE: Hardy-Weinberg equilibrium. The classification was conducted according to the PIC values (PIC value < 0.25, low polymorphism; 0.25 < PIC value < 0.5, moderate polymorphism; and PIC value > 0.5, high polymorphism). No Hardy-Weinberg departure was detected from the obtained genotype frequencies.
