# Supplementary material for: Effects of the Expressions and Variants of the CAST Gene on the Fatty Acid Composition of the Longissimus Thoracis Muscle of Grazing Sonid Sheep
Source: MDPI journal article supplement (doi:10.3390/ani13020195), 2023-01-04
Supplement: s1 [file s1]

**Table S7.** Associations between haplotypes of *CAST* and fatty acid composition in longissimus thoracis muscles in Sonid sheep.

| Fatty acid composition | Genotype of combination (Number) |                         |                         |
|------------------------|----------------------------------|-------------------------|-------------------------|
|                        | H1H1 (238)<br>(GGCCGGCC)         | H1H2 (64)<br>(GCCTGACT) | H1H3 (35)<br>(GGCTGGCC) |
| C4:0                   | 1.85 ± 0.08                      | 1.91 ± 0.19             | 2.01 ± 0.24             |
| C6:0                   | 0.85 ± 0.07                      | 0.72 ± 0.14             | 0.68 ± 0.16             |
| C10:0                  | 0.31 ± 0.01                      | 0.38 ± 0.03             | 0.30 ± 0.04             |
| C11:0                  | 0.46 ± 0.01                      | 0.47 ± 0.02             | 0.44 ± 0.04             |
| C13:0                  | 0.64 ± 0.05                      | 0.60 ± 0.10             | 0.62 ± 0.06             |
| C14:0                  | 1.55 ± 0.04                      | 1.39 ± 0.07             | 1.53 ± 0.09             |
| C15:0                  | 0.76 ± 0.03                      | 0.85 ± 0.06             | 0.77 ± 0.07             |
| C16:0                  | 17.04 ± 0.23                     | 16.29 ± 0.40            | 16.72 ± 0.47            |
| C17:0                  | 0.69 ± 0.12                      | 0.66 ± 0.04             | 0.79 ± 0.21             |
| C18:0                  | 9.21 ± 0.13                      | 8.58 ± 0.24             | 9.23 ± 0.33             |
| C22:0                  | 0.65 ± 0.03                      | 0.38 ± 0.00             | 0.72 ± 0.05             |
| C23:0                  | 0.56 ± 0.02                      | 0.53 ± 0.03             | 0.51 ± 0.03             |
| C24:0                  | 0.53 ± 0.02                      | 0.54 ± 0.03             | 0.52 ± 0.04             |
| SFA                    | 36.08 ± 0.34                     | 34.41 ± 0.60            | 36.73 ± 0.78            |
| C14:1                  | 0.78 ± 0.13                      | 0.51 ± 0.10             | 0.66 ± 0.11             |
| C16:1                  | 0.97 ± 0.10                      | 0.8 ± 0.04              | 0.87 ± 0.05             |
| C17:1                  | 0.73 ± 0.04                      | 0.85 ± 0.04             | 0.77 ± 0.06             |
| C18:1n9t               | 1.72 ± 0.14                      | 2.45 ± 0.41             | 1.69 ± 0.23             |
| C18:1n9c               | 16.16 ± 0.28                     | 14.76 ± 0.52            | 15.76 ± 0.85            |
| C20:1n9                | 0.69 ± 0.03                      | 0.63 ± 0.03             | 0.71 ± 0.04             |
| C22:1n9                | 0.55 ± 0.03                      | 0.65 ± 0.05             | 0.60 ± 0.09             |
| MUFA                   | 21.60 ± 0.33                     | 20.65 ± 0.53            | 21.06 ± 0.87            |
| C18:2n6c               | 4.45 ± 0.08                      | 4.62 ± 0.19             | 4.40 ± 0.15             |
| C20:3n6                | 0.45 ± 0.02                      | 0.46 ± 0.05             | 0.42 ± 0.07             |
| C20:4n6                | 0.55 ± 0.04                      | 0.48 ± 0.06             | 0.51 ± 0.08             |
| C20:5n3                | 0.57 ± 0.03                      | 0.54 ± 0.05             | 0.48 ± 0.06             |
| C22:6n3                | 0.44 ± 0.02                      | 0.38 ± 0.04             | 0.44 ± 0.04             |
| PUFA                   | 8.23 ± 0.15                      | 8.00 ± 0.31             | 7.84 ± 0.27             |
| UFA                    | 29.83 ± 0.4                      | 28.65 ± 0.69            | 28.90 ± 1.01            |
| MUFA/SFA               | 0.60 ± 0.01                      | 0.60 ± 0.02             | 0.57 ± 0.02             |
| PUFA/SFA               | 0.23 ± 0.00                      | 0.23 ± 0.01             | 0.21 ± 0.01             |
| UFA/SFA                | 0.83 ± 0.01                      | 0.83 ± 0.02             | 0.79 ± 0.02             |
| SCFA                   | 1.85 ± 0.08                      | 1.91 ± 0.19             | 2.01 ± 0.24             |
| MCFA                   | 2.06 ± 0.04                      | 2.16 ± 0.07             | 2.11 ± 0.12             |
| LCFA                   | 62.00 ± 0.68                     | 58.99 ± 1.18            | 61.51 ± 1.66            |
| n-6                    | 5.45 ± 0.09                      | 5.56 ± 0.22             | 5.33 ± 0.21             |
| EFA                    | 8.23 ± 0.15                      | 8.00 ± 0.31             | 7.84 ± 0.27             |

Note: Values are shown as the means ± standard error.
