# Supplementary material for: Effects of the Expressions and Variants of the CAST Gene on the Fatty Acid Composition of the Longissimus Thoracis Muscle of Grazing Sonid Sheep
Source: MDPI journal article supplement (doi:10.3390/ani13020195), 2023-01-04
Supplement: s1 [file s1]

**Table S3.** Statistical difference of the *CAST* gene expression between different tissues in Sonid sheep.

|                       | Lung | Subcutaneous fat | Kidney | Large intestine | Small intestine | Semitendinosus muscle | Longissimus muscle | Stomach |
|-----------------------|------|------------------|--------|-----------------|-----------------|-----------------------|--------------------|---------|
| Heart                 | ***  | ***              | ***    | ***             | ***             | ***                   | ***                | ***     |
| Lung                  |      | ***              | ***    | **              | ***             | ***                   | ***                | n.S.    |
| Subcutaneous fat      |      |                  | ***    | ***             | ***             | ***                   | ***                | ***     |
| Kidney                |      |                  |        | ***             | ***             | ***                   | **                 | ***     |
| Large intestine       |      |                  |        |                 | ***             | ***                   | ***                | *       |
| Small intestine       |      |                  |        |                 |                 | ***                   | ***                | ***     |
| Semitendinosus muscle |      |                  |        |                 |                 |                       | ***                | ***     |
| Longissimus muscle    |      |                  |        |                 |                 |                       |                    | ***     |

Note: n.s.: non-significant, \* $p < 0.05$ , \*\* $p < 0.01$ , \*\*\* $p < 0.001$ .
