# Supplementary material for: Effects of the Expressions and Variants of the CAST Gene on the Fatty Acid Composition of the Longissimus Thoracis Muscle of Grazing Sonid Sheep
Source: MDPI journal article supplement (doi:10.3390/ani13020195), 2023-01-04
Supplement: s1 [file s1]

**Table S2.** Correlation analyses between any two traits of fatty acid compositions and classes.

| fatty acid |                | C4:0     | C6:0     | C10:0    | C11:0    | C12:0    | C13:0   | C14:0    | C15:0    | C16:0    | C17:0  | C18:0    | C21:0   | C22:0  | C23:0    |
|------------|----------------|----------|----------|----------|----------|----------|---------|----------|----------|----------|--------|----------|---------|--------|----------|
| C4:0       | <i>r</i> value | 1.000    | 0.680**  | 0.519**  | 0.200*   | 0.268*   | 0.327** | -0.034   | 0.197*   | -0.284** | 0.001  | -0.192*  | 0.127   | 0.053  | -0.071   |
|            | <i>p</i> value |          | 0.000    | 0.000    | 0.027    | 0.014    | 0.002   | 0.668    | 0.028    | 0.000    | 0.993  | 0.012    | 0.329   | 0.767  | 0.541    |
| C6:0       | <i>r</i> value | 0.680**  | 1.000    | 0.748**  | 0.395**  | 0.198    | 0.433** | 0.146    | 0.380**  | -0.285** | -0.219 | -0.046   | 0.048   | 0.027  | -0.003   |
|            | <i>p</i> value | 0.000    |          | 0.000    | 0.002    | 0.192    | 0.001   | 0.158    | 0.001    | 0.005    | 0.093  | 0.652    | 0.758   | 0.896  | 0.989    |
| C10:0      | <i>r</i> value | 0.519**  | 0.748**  | 1.000    | 0.550**  | 0.454**  | 0.512** | 0.122    | 0.319**  | -0.221*  | -0.144 | -0.303** | 0.016   | 0.061  | -0.260*  |
|            | <i>p</i> value | 0.000    | 0.000    |          | 0.000    | 0.000    | 0.000   | 0.174    | 0.000    | 0.011    | 0.246  | 0.000    | 0.925   | 0.742  | 0.015    |
| C11:0      | <i>r</i> value | 0.200*   | 0.395**  | 0.550**  | 1.000    | 0.144    | 0.341** | -0.162** | 0.328**  | -0.450** | -0.159 | -0.321** | -0.043  | -0.126 | -0.387** |
|            | <i>p</i> value | 0.027    | 0.002    | 0.000    |          | 0.156    | 0.003   | 0.005    | 0.000    | 0.000    | 0.101  | 0.000    | 0.754   | 0.426  | 0.000    |
| C12:0      | <i>r</i> value | 0.268*   | 0.198    | 0.454**  | 0.144    | 1.000    | 0.144   | 0.057    | -0.021   | -0.016   | -0.023 | -0.300** | 0.504** | 0.397* | 0.003    |
|            | <i>p</i> value | 0.014    | 0.192    | 0.000    | 0.156    |          | 0.257   | 0.528    | 0.828    | 0.855    | 0.847  | 0.001    | 0.001   | 0.030  | 0.980    |
| C13:0      | <i>r</i> value | 0.327**  | 0.433**  | 0.512**  | 0.341**  | 0.144    | 1.000   | -0.126   | 0.243*   | -0.126   | 0.004  | -0.052   | 0.047   | 0.088  | 0.014    |
|            | <i>p</i> value | 0.002    | 0.001    | 0.000    | 0.003    | 0.257    |         | 0.193    | 0.022    | 0.190    | 0.977  | 0.596    | 0.765   | 0.613  | 0.926    |
| C14:0      | <i>r</i> value | -0.034   | 0.146    | 0.122    | -0.162** | 0.057    | -0.126  | 1.000    | -0.072   | 0.485**  | 0.026  | 0.567**  | 0.074   | -0.136 | 0.234**  |
|            | <i>p</i> value | 0.668    | 0.158    | 0.174    | 0.005    | 0.528    | 0.193   |          | 0.248    | 0.000    | 0.767  | 0.000    | 0.533   | 0.321  | 0.001    |
| C15:0      | <i>r</i> value | 0.197*   | 0.380**  | 0.319**  | 0.328**  | -0.021   | 0.243*  | -0.072   | 1.000    | -0.270** | -0.009 | -0.217** | -0.025  | 0.067  | -0.338** |
|            | <i>p</i> value | 0.028    | 0.001    | 0.000    | 0.000    | 0.828    | 0.022   | 0.248    |          | 0.000    | 0.929  | 0.000    | 0.851   | 0.633  | 0.000    |
| C16:0      | <i>r</i> value | -0.284** | -0.285** | -0.221*  | -0.450** | -0.016   | -0.126  | 0.485**  | -0.270** | 1.000    | 0.067  | 0.590**  | 0.025   | -0.220 | 0.498**  |
|            | <i>p</i> value | 0.000    | 0.005    | 0.011    | 0.000    | 0.855    | 0.190   | 0.000    | 0.000    |          | 0.433  | 0.000    | 0.828   | 0.094  | 0.000    |
| C17:0      | <i>r</i> value | 0.001    | -0.219   | -0.144   | -0.159   | -0.023   | 0.004   | 0.026    | -0.009   | 0.067    | 1.000  | -0.016   | -0.079  | -0.105 | 0.127    |
|            | <i>p</i> value | 0.993    | 0.093    | 0.246    | 0.101    | 0.847    | 0.977   | 0.767    | 0.929    | 0.433    |        | 0.854    | 0.643   | 0.611  | 0.221    |
| C18:0      | <i>r</i> value | -0.192*  | -0.046   | -0.303** | -0.321** | -0.300** | -0.052  | 0.567**  | -0.217** | 0.590**  | -0.016 | 1.000    | 0.041   | -0.030 | 0.387**  |
|            | <i>p</i> value | 0.012    | 0.652    | 0.000    | 0.000    | 0.001    | 0.596   | 0.000    | 0.000    | 0.000    | 0.854  |          | 0.719   | 0.823  | 0.000    |
| C21:0      | <i>r</i> value | 0.127    | 0.048    | 0.016    | -0.043   | 0.504**  | 0.047   | 0.074    | -0.025   | 0.025    | -0.079 | 0.041    | 1.000   | 0.248  | -0.107   |
|            | <i>p</i> value | 0.329    | 0.758    | 0.925    | 0.754    | 0.001    | 0.765   | 0.533    | 0.851    | 0.828    | 0.643  | 0.719    |         | 0.232  | 0.755    |

|          |                |          |          |          |          |          |          |         |          |          |        |         |         |        |         |
|----------|----------------|----------|----------|----------|----------|----------|----------|---------|----------|----------|--------|---------|---------|--------|---------|
| C22:0    | <i>r</i> value | 0.053    | 0.027    | 0.061    | -0.126   | 0.397*   | 0.088    | -0.136  | 0.067    | -0.220   | -0.105 | -0.030  | 0.248   | 1.000  | 0.160   |
|          | <i>p</i> value | 0.767    | 0.896    | 0.742    | 0.426    | 0.030    | 0.613    | 0.321   | 0.633    | 0.094    | 0.611  | 0.823   | 0.232   |        | 0.477   |
| C23:0    | <i>r</i> value | -0.071   | -0.003   | -0.260*  | -0.387** | 0.003    | 0.014    | 0.234** | -0.338** | 0.498**  | 0.127  | 0.387** | -0.107  | 0.160  | 1.000   |
|          | <i>p</i> value | 0.541    | 0.989    | 0.015    | 0.000    | 0.980    | 0.926    | 0.001   | 0.000    | 0.000    | 0.221  | 0.000   | 0.755   | 0.477  |         |
| C24:0    | <i>r</i> value | 0.060    | 0.061    | 0.020    | -0.109   | 0.128    | -0.197   | 0.079   | -0.174*  | 0.174**  | 0.047  | 0.161*  | -0.053  | 0.061  | 0.292** |
|          | <i>p</i> value | 0.613    | 0.737    | 0.846    | 0.111    | 0.247    | 0.175    | 0.248   | 0.023    | 0.010    | 0.657  | 0.018   | 0.857   | 0.778  | 0.000   |
| SFA      | <i>r</i> value | -0.045   | 0.129    | -0.129   | -0.488** | -0.037   | 0.066    | 0.514** | -0.189** | 0.909**  | 0.130  | 0.679** | 0.151   | -0.176 | 0.531** |
|          | <i>p</i> value | 0.561    | 0.208    | 0.141    | 0.000    | 0.681    | 0.492    | 0.000   | 0.002    | 0.000    | 0.128  | 0.000   | 0.182   | 0.182  | 0.000   |
| C14:1    | <i>r</i> value | 0.058    | 0.131    | 0.069    | 0.040    | 0.076    | 0.222*   | -0.039  | -0.122   | -0.030   | -0.068 | 0.048   | -0.029  | 0.277  | 0.152   |
|          | <i>p</i> value | 0.524    | 0.238    | 0.630    | 0.718    | 0.589    | 0.049    | 0.665   | 0.254    | 0.734    | 0.565  | 0.590   | 0.820   | 0.154  | 0.369   |
| C16:1    | <i>r</i> value | -0.291** | -0.121   | -0.065   | -0.017   | -0.026   | -0.167   | 0.180** | -0.030   | 0.105    | 0.034  | 0.089   | 0.046   | 0.102  | 0.237** |
|          | <i>p</i> value | 0.000    | 0.245    | 0.480    | 0.792    | 0.779    | 0.088    | 0.003   | 0.663    | 0.080    | 0.696  | 0.140   | 0.700   | 0.469  | 0.002   |
| C17:1    | <i>r</i> value | 0.078    | 0.248*   | 0.297**  | 0.305**  | 0.341**  | 0.192    | -0.095  | 0.287**  | -0.171** | -0.026 | -0.104  | 0.021   | 0.363* | -0.132* |
|          | <i>p</i> value | 0.368    | 0.029    | 0.002    | 0.000    | 0.000    | 0.068    | 0.114   | 0.000    | 0.003    | 0.781  | 0.079   | 0.881   | 0.027  | 0.050   |
| C18:1n9t | <i>r</i> value | -0.032   | -0.337*  | -0.022   | 0.092    | -0.126   | -0.112   | -0.131  | 0.017    | -0.228** | -0.075 | -0.191* | -0.473* | -0.114 | -0.103  |
|          | <i>p</i> value | 0.774    | 0.023    | 0.861    | 0.271    | 0.299    | 0.480    | 0.105   | 0.851    | 0.004    | 0.473  | 0.016   | 0.026   | 0.522  | 0.253   |
| C18:1n9c | <i>r</i> value | -0.467** | -0.388** | -0.337** | -0.421** | -0.238** | -0.249** | 0.453** | -0.315** | 0.723**  | -0.003 | 0.639** | -0.142  | -0.045 | 0.451** |
|          | <i>p</i> value | 0.000    | 0.000    | 0.000    | 0.000    | 0.007    | 0.009    | 0.000   | 0.000    | 0.000    | 0.972  | 0.000   | 0.209   | 0.737  | 0.000   |
| C20:1n9  | <i>r</i> value | -0.130   | -0.110   | -0.189   | -0.178   | -0.195   | -0.067   | -0.001  | -0.096   | 0.161    | 0.190  | 0.096   | 0.599   | -0.015 | -0.014  |
|          | <i>p</i> value | 0.308    | 0.510    | 0.336    | 0.080    | 0.329    | 0.741    | 0.990   | 0.441    | 0.093    | 0.133  | 0.321   | 0.067   | 0.972  | 0.891   |
| C22:1n9  | <i>r</i> value | 0.177    | 0.153    | 0.144    | -0.047   | 0.215    | 0.239*   | -0.024  | 0.161    | -0.123   | 0.145  | -0.048  | 0.083   | 0.117  | 0.280   |
|          | <i>p</i> value | 0.070    | 0.208    | 0.401    | 0.720    | 0.160    | 0.050    | 0.808   | 0.187    | 0.211    | 0.320  | 0.625   | 0.530   | 0.560  | 0.354   |
| MUFA     | <i>r</i> value | -0.413** | -0.367** | -0.251** | -0.448** | -0.181*  | -0.135   | 0.306** | -0.290** | 0.610**  | -0.007 | 0.446** | -0.140  | -0.054 | 0.381** |
|          | <i>p</i> value | 0.000    | 0.000    | 0.004    | 0.000    | 0.042    | 0.158    | 0.000   | 0.000    | 0.000    | 0.940  | 0.000   | 0.217   | 0.683  | 0.000   |
| C18:2n6c | <i>r</i> value | -0.182*  | -0.219*  | -0.207*  | -0.383** | -0.100   | -0.291** | 0.209** | -0.188** | 0.579**  | 0.002  | 0.362** | -0.089  | 0.022  | 0.498** |
|          | <i>p</i> value | 0.017    | 0.031    | 0.023    | 0.000    | 0.268    | 0.002    | 0.000   | 0.003    | 0.000    | 0.984  | 0.000   | 0.443   | 0.875  | 0.000   |

|          |                |          |          |          |          |          |          |          |          |          |        |          |         |        |         |
|----------|----------------|----------|----------|----------|----------|----------|----------|----------|----------|----------|--------|----------|---------|--------|---------|
| C18:3n3  | <i>r</i> value | -0.138   | -0.091   | -0.247*  | -0.261** | -0.177   | -0.040   | 0.223**  | -0.096   | 0.299**  | 0.045  | 0.206**  | -0.126  | -0.084 | 0.369** |
|          | <i>p</i> value | 0.137    | 0.470    | 0.010    | 0.000    | 0.079    | 0.697    | 0.000    | 0.173    | 0.000    | 0.684  | 0.001    | 0.318   | 0.565  | 0.000   |
| C20:3n6  | <i>r</i> value | 0.210    | -0.134   | 0.053    | -0.040   | -0.126   | -0.103   | -0.062   | 0.140    | 0.287**  | 0.026  | 0.002    | 0.198   | -0.222 | 0.082   |
|          | <i>p</i> value | 0.061    | 0.340    | 0.718    | 0.718    | 0.398    | 0.475    | 0.560    | 0.201    | 0.005    | 0.842  | 0.981    | 0.246   | 0.285  | 0.530   |
| C20:4n6  | <i>r</i> value | -0.017   | 0.064    | 0.089    | -0.081   | 0.165    | 0.042    | 0.251**  | -0.164   | 0.219**  | -0.002 | 0.218**  | 0.212   | -0.094 | -0.002  |
|          | <i>p</i> value | 0.856    | 0.602    | 0.483    | 0.367    | 0.183    | 0.712    | 0.001    | 0.063    | 0.004    | 0.983  | 0.005    | 0.085   | 0.614  | 0.988   |
| C20:5n3  | <i>r</i> value | -0.067   | -0.136   | -0.017   | -0.357** | 0.126    | -0.003   | -0.048   | -0.139   | 0.064    | 0.159  | -0.064   | -0.249* | -0.287 | -0.383  |
|          | <i>r</i> value | 0.502    | 0.265    | 0.917    | 0.001    | 0.415    | 0.979    | 0.590    | 0.183    | 0.465    | 0.254  | 0.468    | 0.037   | 0.095  | 0.245   |
| C22:6n3  | <i>p</i> value | 0.088    | -0.089   | -0.231   | -0.252*  | -0.176   | 0.456*   | 0.414**  | -0.259*  | 0.446**  | 0.000  | 0.371**  | -0.193  | -0.111 | 0.347** |
|          | <i>r</i> value | 0.572    | 0.671    | 0.146    | 0.050    | 0.236    | 0.011    | 0.001    | 0.044    | 0.000    | 0.997  | 0.003    | 0.679   | 0.681  | 0.006   |
| PUFA     | <i>p</i> value | -0.273** | -0.045   | -0.104   | -0.276** | -0.161   | -0.135   | 0.139**  | 0.013    | 0.424**  | 0.000  | 0.116*   | -0.182  | -0.020 | 0.291** |
|          | <i>r</i> value | 0.000    | 0.663    | 0.239    | 0.000    | 0.072    | 0.160    | 0.009    | 0.829    | 0.000    | 1.000  | 0.026    | 0.110   | 0.879  | 0.000   |
| UFA      | <i>p</i> value | -0.456** | -0.343** | -0.242** | -0.453** | -0.212*  | -0.169   | 0.299**  | -0.225** | 0.650**  | -0.005 | 0.397**  | -0.193  | -0.076 | 0.408** |
|          | <i>r</i> value | 0.000    | 0.001    | 0.005    | 0.000    | 0.017    | 0.077    | 0.000    | 0.000    | 0.000    | 0.952  | 0.000    | 0.087   | 0.566  | 0.000   |
| MUFA/SFA | <i>p</i> value | -0.409** | -0.437** | -0.195*  | -0.172** | -0.194*  | -0.193*  | -0.039   | -0.205** | 0.033    | -0.114 | -0.012   | -0.227* | 0.016  | -0.008  |
|          | <i>r</i> value | 0.000    | 0.000    | 0.025    | 0.002    | 0.028    | 0.043    | 0.465    | 0.001    | 0.520    | 0.183  | 0.811    | 0.043   | 0.902  | 0.899   |
| PUFA/SFA | <i>p</i> value | -0.288** | -0.105   | -0.067   | -0.060   | -0.166   | -0.169   | -0.110*  | 0.108    | 0.008    | -0.070 | -0.193** | -0.254* | 0.067  | -0.067  |
|          | <i>r</i> value | 0.000    | 0.306    | 0.447    | 0.282    | 0.063    | 0.077    | 0.039    | 0.076    | 0.876    | 0.413  | 0.000    | 0.025   | 0.615  | 0.307   |
| UFA/SFA  | <i>p</i> value | -0.487** | -0.438** | -0.194*  | -0.161** | -0.243** | -0.249** | -0.087   | -0.119   | 0.027    | -0.135 | -0.105*  | -0.285* | 0.029  | -0.033  |
|          | <i>p</i> value | 0.000    | 0.000    | 0.026    | 0.003    | 0.006    | 0.009    | 0.106    | 0.051    | 0.606    | 0.115  | 0.042    | 0.010   | 0.826  | 0.617   |
| SCFA     | <i>r</i> value | 1.000**  | 0.680**  | 0.519**  | 0.200*   | 0.268*   | 0.327**  | -0.034   | 0.197*   | -0.284** | 0.001  | -0.192*  | 0.127   | 0.053  | -0.071  |
|          | <i>p</i> value | 0.000    | 0.000    | 0.000    | 0.027    | 0.014    | 0.002    | 0.668    | 0.028    | 0.000    | 0.993  | 0.012    | 0.329   | 0.767  | 0.541   |
| MCFA     | <i>r</i> value | 0.261**  | 0.730**  | 0.695**  | 0.286**  | 0.572**  | 0.326**  | -0.139** | 0.229**  | -0.185** | -0.083 | -0.384** | -0.034  | 0.140  | -0.149* |
|          | <i>p</i> value | 0.001    | 0.000    | 0.000    | 0.000    | 0.000    | 0.001    | 0.009    | 0.000    | 0.000    | 0.339  | 0.000    | 0.765   | 0.289  | 0.024   |
| LCFA     | <i>r</i> value | -0.418** | -0.308** | -0.278** | -0.520** | -0.204*  | -0.121   | 0.483**  | -0.250** | 0.855**  | 0.062  | 0.646**  | -0.053  | -0.140 | 0.500** |
|          | <i>p</i> value | 0.000    | 0.002    | 0.001    | 0.000    | 0.021    | 0.209    | 0.000    | 0.000    | 0.000    | 0.469  | 0.000    | 0.644   | 0.289  | 0.000   |

|         |                |          |          |         |          |        |         |          |         |         |        |         |        |        |         |
|---------|----------------|----------|----------|---------|----------|--------|---------|----------|---------|---------|--------|---------|--------|--------|---------|
| n-6     | <i>r</i> value | -0.240** | -0.216*  | -0.150  | -0.325** | -0.057 | -0.234* | 0.136*   | -0.152* | 0.520** | 0.010  | 0.215** | -0.080 | 0.051  | 0.452** |
|         | <i>p</i> value | 0.008    | 0.010    | 0.010   | 0.000    | 0.223  | 0.004   | 0.001    | 0.003   | 0.000   | 0.764  | 0.000   | 0.394  | 0.945  | 0.000   |
| n-3     | <i>r</i> value | -0.021   | 0.183    | -0.045  | -0.050   | -0.182 | 0.096   | 0.332**  | -0.003  | 0.320** | -0.022 | 0.189** | -0.199 | -0.011 | 0.199*  |
|         | <i>p</i> value | 0.137    | 0.470    | 0.010   | 0.000    | 0.079  | 0.697   | 0.000    | 0.173   | 0.000   | 0.684  | 0.001   | 0.318  | 0.565  | 0.000   |
| n-6/n-3 | <i>r</i> value | -0.139   | -0.327** | -0.211* | -0.289** | 0.158  | -0.226* | -0.349** | -0.168* | -0.022  | 0.030  | -0.145* | 0.223  | 0.104  | 0.132   |
|         | <i>p</i> value | 0.377    | 0.105    | 0.461   | 0.963    | 0.213  | 0.168   | 0.005    | 0.739   | 0.095   | 0.894  | 0.191   | 0.108  | 0.236  | 0.005   |
| EFA     | <i>r</i> value | -0.273** | -0.045   | -0.104  | -0.276** | -0.161 | -0.135  | 0.139**  | 0.013   | 0.424** | 0.000  | 0.116*  | -0.182 | -0.020 | 0.291** |
|         | <i>p</i> value | 0.002    | 0.510    | 0.143   | 0.000    | 0.013  | 0.056   | 0.000    | 0.981   | 0.000   | 0.978  | 0.000   | 0.130  | 0.758  | 0.000   |

Note: \* $p < 0.05$ , \*\* $p < 0.01$ .

Table S2. (continued)

|       |                | C24:0   | SFA      | C14:1  | C16:1    | C17:1    | C18:1<br>n9t | C18:1<br>n9c | C20:1<br>n9 | C22:1<br>n9 | MUF<br>A | C18:2<br>n6c | C18:3<br>n3 | C20:3<br>n6 | C20:4<br>n6 |
|-------|----------------|---------|----------|--------|----------|----------|--------------|--------------|-------------|-------------|----------|--------------|-------------|-------------|-------------|
| C4:0  | <i>r</i> value | 0.060   | -0.045   | 0.058  | -0.291** | 0.078    | -0.032       | -0.467**     | -0.130      | 0.177       | -0.413** | -0.182*      | -0.138      | 0.210       | -0.017      |
|       | <i>p</i> value | 0.613   | 0.561    | 0.524  | 0.000    | 0.368    | 0.774        | 0.000        | 0.308       | 0.070       | 0.000    | 0.017        | 0.137       | 0.061       | 0.856       |
| C6:0  | <i>r</i> value | 0.061   | 0.129    | 0.131  | -0.121   | 0.248*   | -0.337*      | -0.388**     | -0.110      | 0.153       | -0.367** | -0.219*      | -0.091      | -0.134      | 0.064       |
|       | <i>p</i> value | 0.737   | 0.208    | 0.238  | 0.245    | 0.029    | 0.023        | 0.000        | 0.510       | 0.208       | 0.000    | 0.031        | 0.470       | 0.340       | 0.602       |
| C10:0 | <i>r</i> value | 0.020   | -0.129   | 0.069  | -0.065   | 0.297**  | -0.022       | -0.337**     | -0.189      | 0.144       | -0.251** | -0.207*      | -0.247*     | 0.053       | 0.089       |
|       | <i>p</i> value | 0.846   | 0.141    | 0.630  | 0.480    | 0.002    | 0.861        | 0.000        | 0.336       | 0.401       | 0.004    | 0.023        | 0.010       | 0.718       | 0.483       |
| C11:0 | <i>r</i> value | -0.109  | -0.488** | 0.040  | -0.017   | 0.305**  | 0.092        | -0.421**     | -0.178      | -0.047      | -0.448** | -0.383**     | -0.261**    | -0.040      | -0.081      |
|       | <i>p</i> value | 0.111   | 0.000    | 0.718  | 0.792    | 0.000    | 0.271        | 0.000        | 0.080       | 0.720       | 0.000    | 0.000        | 0.000       | 0.718       | 0.367       |
| C12:0 | <i>r</i> value | 0.128   | -0.037   | 0.076  | -0.026   | 0.341**  | -0.126       | -0.238**     | -0.195      | 0.215       | -0.181*  | -0.100       | -0.177      | -0.126      | 0.165       |
|       | <i>p</i> value | 0.247   | 0.681    | 0.589  | 0.779    | 0.000    | 0.299        | 0.007        | 0.329       | 0.160       | 0.042    | 0.268        | 0.079       | 0.398       | 0.183       |
| C13:0 | <i>r</i> value | -0.197  | 0.066    | 0.222* | -0.167   | 0.192    | -0.112       | -0.249**     | -0.067      | 0.239*      | -0.135   | -0.291**     | -0.040      | -0.103      | 0.042       |
|       | <i>p</i> value | 0.175   | 0.492    | 0.049  | 0.088    | 0.068    | 0.480        | 0.009        | 0.741       | 0.050       | 0.158    | 0.002        | 0.697       | 0.475       | 0.712       |
| C14:0 | <i>r</i> value | 0.079   | 0.514**  | -0.039 | 0.180**  | -0.095   | -0.131       | 0.453**      | -0.001      | -0.024      | 0.306**  | 0.209**      | 0.223**     | -0.062      | 0.251**     |
|       | <i>p</i> value | 0.248   | 0.000    | 0.665  | 0.003    | 0.114    | 0.105        | 0.000        | 0.990       | 0.808       | 0.000    | 0.000        | 0.000       | 0.560       | 0.001       |
| C15:0 | <i>r</i> value | -0.174* | -0.189** | -0.122 | -0.030   | 0.287**  | 0.017        | -0.315**     | -0.096      | 0.161       | -0.290** | -0.188**     | -0.096      | 0.140       | -0.164      |
|       | <i>p</i> value | 0.023   | 0.002    | 0.254  | 0.663    | 0.000    | 0.851        | 0.000        | 0.441       | 0.187       | 0.000    | 0.003        | 0.173       | 0.201       | 0.063       |
| C16:0 | <i>r</i> value | 0.174** | 0.909**  | -0.030 | 0.105    | -0.171** | -0.228**     | 0.723**      | 0.161       | -0.123      | 0.610**  | 0.579**      | 0.299**     | 0.287**     | 0.219**     |
|       | <i>p</i> value | 0.010   | 0.000    | 0.734  | 0.080    | 0.003    | 0.004        | 0.000        | 0.093       | 0.211       | 0.000    | 0.000        | 0.000       | 0.005       | 0.004       |
| C17:0 | <i>r</i> value | 0.047   | 0.130    | -0.068 | 0.034    | -0.026   | -0.075       | -0.003       | 0.190       | 0.145       | -0.007   | 0.002        | 0.045       | 0.026       | -0.002      |
|       | <i>p</i> value | 0.657   | 0.128    | 0.565  | 0.696    | 0.781    | 0.473        | 0.972        | 0.133       | 0.320       | 0.940    | 0.984        | 0.684       | 0.842       | 0.983       |
| C18:0 | <i>r</i> value | 0.161*  | 0.679**  | 0.048  | 0.089    | -0.104   | -0.191*      | 0.639**      | 0.096       | -0.048      | 0.446**  | 0.362**      | 0.206**     | 0.002       | 0.218**     |
|       | <i>p</i> value | 0.018   | 0.000    | 0.590  | 0.140    | 0.079    | 0.016        | 0.000        | 0.321       | 0.625       | 0.000    | 0.000        | 0.001       | 0.981       | 0.005       |
| C21:0 | <i>r</i> value | -0.053  | 0.151    | -0.029 | 0.046    | 0.021    | -0.473*      | -0.142       | 0.599       | 0.083       | -0.140   | -0.089       | -0.126      | 0.198       | 0.212       |

|          |                |         |          |         |          |          |          |          |         |        |          |          |         |        |         |
|----------|----------------|---------|----------|---------|----------|----------|----------|----------|---------|--------|----------|----------|---------|--------|---------|
| C22:0    | <i>p</i> value | 0.857   | 0.182    | 0.820   | 0.700    | 0.881    | 0.026    | 0.209    | 0.067   | 0.530  | 0.217    | 0.443    | 0.318   | 0.246  | 0.085   |
|          | <i>r</i> value | 0.061   | -0.176   | 0.277   | 0.102    | 0.363*   | -0.114   | -0.045   | -0.015  | 0.117  | -0.054   | 0.022    | -0.084  | -0.222 | -0.094  |
| C23:0    | <i>p</i> value | 0.778   | 0.182    | 0.154   | 0.469    | 0.027    | 0.522    | 0.737    | 0.972   | 0.560  | 0.683    | 0.875    | 0.565   | 0.285  | 0.614   |
|          | <i>r</i> value | 0.292** | 0.531**  | 0.152   | 0.237**  | -0.132*  | -0.103   | 0.451**  | -0.014  | 0.280  | 0.381**  | 0.498**  | 0.369** | 0.082  | -0.002  |
| C24:0    | <i>p</i> value | 0.000   | 0.000    | 0.369   | 0.002    | 0.050    | 0.253    | 0.000    | 0.891   | 0.354  | 0.000    | 0.000    | 0.000   | 0.530  | 0.988   |
|          | <i>r</i> value | 1.000   | 0.247**  | 0.042   | -0.059   | 0.073    | -0.103   | 0.164*   | -0.050  | 0.385  | 0.115    | 0.343**  | 0.086   | -0.059 | 0.015   |
| SFA      | <i>p</i> value |         | 0.000    | 0.801   | 0.451    | 0.300    | 0.259    | 0.015    | 0.646   | 0.174  | 0.088    | 0.000    | 0.328   | 0.655  | 0.921   |
|          | <i>r</i> value | 0.247** | 1.000    | -0.043  | 0.091    | -0.205** | -0.283** | 0.724**  | 0.151   | -0.011 | 0.624**  | 0.568**  | 0.299** | 0.190  | 0.190*  |
| C14:1    | <i>p</i> value | 0.000   |          | 0.629   | 0.128    | 0.000    | 0.000    | 0.000    | 0.116   | 0.914  | 0.000    | 0.000    | 0.000   | 0.067  | 0.013   |
|          | <i>r</i> value | 0.042   | -0.043   | 1.000   | 0.016    | -0.014   | 0.018    | 0.074    | 0.099   | 0.053  | 0.261**  | 0.025    | -0.083  | -0.055 | 0.134   |
| C16:1    | <i>p</i> value | 0.801   | 0.629    |         | 0.858    | 0.893    | 0.908    | 0.403    | 0.560   | 0.595  | 0.003    | 0.777    | 0.394   | 0.673  | 0.163   |
|          | <i>r</i> value | -0.059  | 0.091    | 0.016   | 1.000    | -0.205** | -0.056   | 0.209**  | -0.005  | -0.107 | 0.392**  | 0.061    | 0.028   | -0.143 | 0.128   |
| C17:1    | <i>p</i> value | 0.451   | 0.128    | 0.858   |          | 0.002    | 0.499    | 0.000    | 0.961   | 0.287  | 0.000    | 0.317    | 0.699   | 0.171  | 0.124   |
|          | <i>r</i> value | 0.073   | -0.205** | -0.014  | -0.205** | 1.000    | 0.000    | -0.258** | -0.071  | -0.055 | -0.166** | -0.251** | -0.167* | -0.100 | 0.090   |
| C18:1n9t | <i>p</i> value | 0.300   | 0.000    | 0.893   | 0.002    |          | 0.997    | 0.000    | 0.485   | 0.646  | 0.004    | 0.000    | 0.023   | 0.358  | 0.361   |
|          | <i>r</i> value | -0.103  | -0.283** | 0.018   | -0.056   | 0.000    | 1.000    | -0.133   | 0.155   | 0.104  | 0.148    | -0.065   | -0.006  | -0.151 | 0.015   |
| C18:1n9c | <i>p</i> value | 0.259   | 0.000    | 0.908   | 0.499    | 0.997    |          | 0.096    | 0.201   | 0.599  | 0.062    | 0.418    | 0.953   | 0.262  | 0.914   |
|          | <i>r</i> value | 0.164*  | 0.724**  | 0.074   | 0.209**  | -0.258** | -0.133   | 1.000    | 0.107   | -0.118 | 0.909**  | 0.484**  | 0.266** | -0.131 | 0.274** |
| C20:1n9  | <i>p</i> value | 0.015   | 0.000    | 0.403   | 0.000    | 0.000    | 0.096    |          | 0.270   | 0.230  | 0.000    | 0.000    | 0.000   | 0.212  | 0.000   |
|          | <i>r</i> value | -0.050  | 0.151    | 0.099   | -0.005   | -0.071   | 0.155    | 0.107    | 1.000   | -0.164 | 0.213*   | 0.369**  | 0.243   | 0.285  | 0.075   |
| C22:1n9  | <i>p</i> value | 0.646   | 0.116    | 0.560   | 0.961    | 0.485    | 0.201    | 0.270    |         | 0.444  | 0.026    | 0.000    | 0.316   | 0.067  | 0.728   |
|          | <i>r</i> value | 0.385   | -0.011   | 0.053   | -0.107   | -0.055   | 0.104    | -0.118   | -0.164  | 1.000  | 0.012    | -0.142   | -0.144  | 0.016  | 0.109   |
| MUFA     | <i>p</i> value | 0.174   | 0.914    | 0.595   | 0.287    | 0.646    | 0.599    | 0.230    | 0.444   |        | 0.906    | 0.147    | 0.161   | 0.921  | 0.278   |
|          | <i>r</i> value | 0.115   | 0.624**  | 0.261** | 0.392**  | -0.166** | 0.148    | 0.909**  | 0.213*  | 0.012  | 1.000    | 0.417**  | 0.219** | -0.159 | 0.250** |
| C18:2n6c | <i>p</i> value | 0.088   | 0.000    | 0.003   | 0.000    | 0.004    | 0.062    | 0.000    | 0.026   | 0.906  |          | 0.000    | 0.000   | 0.126  | 0.001   |
|          | <i>r</i> value | 0.343** | 0.568**  | 0.025   | 0.061    | -0.251** | -0.065   | 0.484**  | 0.369** | -0.142 | 0.417**  | 1.000    | 0.227** | 0.037  | 0.338** |

|         |                |         |         |         |          |          |         |          |         |        |          |         |         |          |         |
|---------|----------------|---------|---------|---------|----------|----------|---------|----------|---------|--------|----------|---------|---------|----------|---------|
| C18:3n3 | <i>p</i> value | 0.000   | 0.000   | 0.777   | 0.317    | 0.000    | 0.418   | 0.000    | 0.000   | 0.147  | 0.000    | 0.000   | 0.725   | 0.000    |         |
|         | <i>r</i> value | 0.086   | 0.299** | -0.083  | 0.028    | -0.167*  | -0.006  | 0.266**  | 0.243   | -0.144 | 0.219**  | 0.227** | 1.000   | -0.046   | 0.050   |
| C20:3n6 | <i>p</i> value | 0.328   | 0.000   | 0.394   | 0.699    | 0.023    | 0.953   | 0.000    | 0.316   | 0.161  | 0.000    | 0.000   | 0.733   | 0.541    |         |
|         | <i>r</i> value | -0.059  | 0.190   | -0.055  | -0.143   | -0.100   | -0.151  | -0.131   | 0.285   | 0.016  | -0.159   | 0.037   | -0.046  | 1.000    | -0.207  |
| C20:4n6 | <i>p</i> value | 0.655   | 0.067   | 0.673   | 0.171    | 0.358    | 0.262   | 0.212    | 0.067   | 0.921  | 0.126    | 0.725   | 0.733   | 0.163    |         |
|         | <i>r</i> value | 0.015   | 0.190*  | 0.134   | 0.128    | 0.090    | 0.015   | 0.274**  | 0.075   | 0.109  | 0.250**  | 0.338** | 0.050   | -0.207   | 1.000   |
| C20:5n3 | <i>p</i> value | 0.921   | 0.013   | 0.163   | 0.124    | 0.361    | 0.914   | 0.000    | 0.728   | 0.278  | 0.001    | 0.000   | 0.541   | 0.163    |         |
|         | <i>r</i> value | -0.327  | -0.055  | 0.115   | -0.062   | -0.038   | -0.137  | -0.029   | 0.617** | 0.210* | 0.019    | 0.099   | 0.104   | 0.071    | 0.132   |
| C22:6n3 | <i>p</i> value | 0.300   | 0.533   | 0.245   | 0.507    | 0.749    | 0.400   | 0.746    | 0.003   | 0.035  | 0.833    | 0.260   | 0.262   | 0.664    | 0.143   |
|         | <i>r</i> value | 0.180   | 0.449** | 0.416*  | 0.053    | -0.147   | -0.154  | 0.309*   | 0.515** | 0.363  | 0.000    | 0.249*  | 0.183   | 0.238    | -0.083  |
| PUFA    | <i>p</i> value | 0.165   | 0.000   | 0.035   | 0.677    | 0.251    | 0.295   | 0.013    | 0.004   | 0.377  | 0.999    | 0.047   | 0.265   | 0.096    | 0.742   |
|         | <i>r</i> value | 0.036   | 0.422** | 0.014   | 0.119*   | -0.261** | -0.156  | 0.354**  | 0.377** | -0.095 | 0.331**  | 0.775** | 0.461** | 0.047    | 0.440** |
| UFA     | <i>p</i> value | 0.598   | 0.000   | 0.875   | 0.048    | 0.000    | 0.050   | 0.000    | 0.000   | 0.334  | 0.000    | 0.000   | 0.000   | 0.653    | 0.000   |
|         | <i>r</i> value | 0.110   | 0.660** | 0.240** | 0.376**  | -0.229** | 0.071   | 0.854**  | 0.333** | -0.022 | 0.933**  | 0.605** | 0.345** | -0.121   | 0.350** |
| MUFA/SF | <i>p</i> value | 0.102   | 0.000   | 0.006   | 0.000    | 0.000    | 0.375   | 0.000    | 0.000   | 0.823  | 0.000    | 0.000   | 0.000   | 0.246    | 0.000   |
|         | <i>r</i> value | -0.084  | -0.011  | 0.311** | 0.371**  | -0.031   | 0.508** | 0.547**  | 0.097   | 0.013  | 0.757**  | 0.074   | 0.037   | -0.286** | 0.182*  |
| A       | <i>p</i> value | 0.216   | 0.833   | 0.000   | 0.000    | 0.600    | 0.000   | 0.000    | 0.315   | 0.895  | 0.000    | 0.165   | 0.553   | 0.005    | 0.017   |
| PUFA/SF | <i>r</i> value | -0.134* | -0.045  | 0.040   | 0.078    | -0.176** | 0.035   | 0.021    | 0.346** | -0.096 | 0.054    | 0.535** | 0.360** | -0.041   | 0.374** |
|         | <i>p</i> value | 0.047   | 0.385   | 0.650   | 0.192    | 0.003    | 0.663   | 0.688    | 0.000   | 0.329  | 0.295    | 0.000   | 0.000   | 0.695    | 0.000   |
| UFA/SFA | <i>r</i> value | -0.129  | -0.035  | 0.296** | 0.359**  | -0.103   | 0.465** | 0.455**  | 0.242*  | -0.022 | 0.660*   | 0.274** | 0.180** | -0.267** | 0.290** |
|         | <i>p</i> value | 0.056   | 0.503   | 0.001   | 0.000    | 0.079    | 0.000   | 0.000    | 0.011   | 0.824  | 0.000    | 0.000   | 0.004   | 0.009    | 0.000   |
| SCFA    | <i>r</i> value | 0.060   | -0.045  | 0.058   | -0.291** | 0.078    | -0.032  | -0.467** | -0.130  | 0.177  | -0.413** | -0.182* | -0.138  | 0.210    | -0.017  |
|         | <i>p</i> value | 0.613   | 0.561   | 0.524   | 0.000    | 0.368    | 0.774   | 0.000    | 0.308   | 0.070  | 0.000    | 0.017   | 0.137   | 0.061    | 0.856   |
| MCFA    | <i>r</i> value | 0.012   | -0.011  | -0.054  | -0.074   | 0.074    | -0.042  | -0.238** | -0.101  | 0.043  | -0.138** | -0.108* | -0.097  | -0.276** | -0.161* |
|         | <i>p</i> value | 0.857   | 0.825   | 0.544   | 0.218    | 0.210    | 0.605   | 0.000    | 0.297   | 0.670  | 0.007    | 0.042   | 0.121   | 0.007    | 0.037   |
| LCFA    | <i>r</i> value | 0.190** | 0.883** | 0.131   | 0.277**  | -0.230** | -0.091  | 0.891**  | 0.278** | -0.047 | 0.874**  | 0.638** | 0.365** | 0.028    | 0.338** |

|         |                |         |         |        |        |          |        |         |         |        |         |         |          |        |         |
|---------|----------------|---------|---------|--------|--------|----------|--------|---------|---------|--------|---------|---------|----------|--------|---------|
| n-6     | <i>p</i> value | 0.005   | 0.000   | 0.136  | 0.000  | 0.000    | 0.253  | 0.000   | 0.003   | 0.635  | 0.000   | 0.000   | 0.000    | 0.788  | 0.000   |
|         | <i>r</i> value | 0.296** | 0.494** | 0.033  | 0.100  | -0.236** | -0.071 | 0.443** | 0.421** | -0.109 | 0.416** | 0.955** | 0.191**  | 0.173  | 0.509** |
| n-3     | <i>p</i> value | 0.000   | 0.000   | 0.728  | 0.393  | 0.000    | 0.434  | 0.000   | 0.000   | 0.195  | 0.000   | 0.000   | 0.001    | 0.266  | 0.000   |
|         | <i>r</i> value | 0.019   | 0.332** | -0.016 | 0.075  | -0.255** | -0.128 | 0.280** | 0.115   | -0.025 | 0.188** | 0.243** | 0.899**  | -0.031 | 0.153*  |
| n-6/n-3 | <i>p</i> value | 0.328   | 0.000   | 0.394  | 0.699  | 0.023    | 0.953  | 0.000   | 0.316   | 0.161  | 0.000   | 0.000   | 0.000    | 0.733  | 0.541   |
|         | <i>r</i> value | 0.104   | -0.044  | 0.003  | -0.051 | 0.082    | 0.117  | -0.035  | -0.150  | 0.000  | 0.078   | 0.159** | -0.624** | 0.010  | 0.078   |
| EFA     | <i>p</i> value | 0.204   | 0.340   | 0.266  | 0.966  | 0.183    | 0.212  | 0.447   | 0.947   | 0.461  | 0.254   | 0.000   | 0.000    | 0.270  | 0.050   |
|         | <i>r</i> value | 0.036   | 0.422** | 0.014  | 0.119* | -0.261** | -0.156 | 0.354** | 0.377** | -0.095 | 0.331** | 0.775** | 0.461**  | 0.047  | 0.440** |
|         | <i>p</i> value | 0.433   | 0.000   | 0.929  | 0.119  | 0.000    | 0.063  | 0.000   | 0.000   | 0.105  | 0.000   | 0.000   | 0.000    | 0.941  | 0.001   |

Note: \* $p < 0.05$ , \*\* $p < 0.01$ .



Table S2. (continued)

|            |                | C20:5    | C22:6   |          |          | MUF      | PUFA/    | UFA/S    |          |          |          |          |         |          |          |
|------------|----------------|----------|---------|----------|----------|----------|----------|----------|----------|----------|----------|----------|---------|----------|----------|
| fatty acid |                | n3       | n3      | PUFA     | UFA      | A/SFA    | SFA      | FA       | SCFA     | MCFA     | LCFA     | n-6      | n-3     | n-6/n-3  | EFA      |
| C4:0       | <i>r</i> value | -0.067   | 0.088   | -0.273** | -0.456** | -0.409** | -0.288** | -0.487** | 1.000**  | 0.261**  | -0.418** | -0.240** | -0.021  | -0.139   | -0.273** |
|            | <i>p</i> value | 0.502    | 0.572   | 0.000    | 0.000    | 0.000    | 0.000    | 0.000    | 0.000    | 0.001    | 0.000    | 0.008    | 0.137   | 0.377    | 0.002    |
| C6:0       | <i>r</i> value | -0.136   | -0.089  | -0.045   | -0.343** | -0.437** | -0.105   | -0.438** | 0.680**  | 0.730**  | -0.308** | -0.216*  | 0.183   | -0.327** | -0.045   |
|            | <i>p</i> value | 0.265    | 0.671   | 0.663    | 0.001    | 0.000    | 0.306    | 0.000    | 0.000    | 0.000    | 0.002    | 0.010    | 0.470   | 0.105    | 0.510    |
| C10:0      | <i>r</i> value | -0.017   | -0.231  | -0.104   | -0.242** | -0.195*  | -0.067   | -0.194*  | 0.519**  | 0.695**  | -0.278** | -0.150   | -0.045  | -0.211*  | -0.104   |
|            | <i>p</i> value | 0.917    | 0.146   | 0.239    | 0.005    | 0.025    | 0.447    | 0.026    | 0.000    | 0.000    | 0.001    | 0.010    | 0.010   | 0.461    | 0.143    |
| C11:0      | <i>r</i> value | -0.357** | -0.252* | -0.276** | -0.453** | -0.172** | -0.060   | -0.161** | 0.200*   | 0.286**  | -0.520** | -0.325** | -0.050  | -0.289** | -0.276** |
|            | <i>p</i> value | 0.001    | 0.050   | 0.000    | 0.000    | 0.002    | 0.282    | 0.003    | 0.027    | 0.000    | 0.000    | 0.000    | 0.000   | 0.963    | 0.000    |
| C12:0      | <i>r</i> value | 0.126    | -0.176  | -0.161   | -0.212*  | -0.194*  | -0.166   | -0.243** | 0.268*   | 0.572**  | -0.204*  | -0.057   | -0.182  | 0.158    | -0.161   |
|            | <i>p</i> value | 0.415    | 0.236   | 0.072    | 0.017    | 0.028    | 0.063    | 0.006    | 0.014    | 0.000    | 0.021    | 0.223    | 0.079   | 0.213    | 0.013    |
| C13:0      | <i>r</i> value | -0.003   | 0.456*  | -0.135   | -0.169   | -0.193*  | -0.169   | -0.249** | 0.327**  | 0.326**  | -0.121   | -0.234*  | 0.096   | -0.226*  | -0.135   |
|            | <i>p</i> value | 0.979    | 0.011   | 0.160    | 0.077    | 0.043    | 0.077    | 0.009    | 0.002    | 0.001    | 0.209    | 0.004    | 0.697   | 0.168    | 0.056    |
| C14:0      | <i>r</i> value | -0.048   | 0.414** | 0.139**  | 0.299**  | -0.039   | -0.110*  | -0.087   | -0.034   | -0.139** | 0.483**  | 0.136*   | 0.332** | -0.349** | 0.139**  |
|            | <i>p</i> value | 0.590    | 0.001   | 0.009    | 0.000    | 0.465    | 0.039    | 0.106    | 0.668    | 0.009    | 0.000    | 0.001    | 0.000   | 0.005    | 0.000    |
| C15:0      | <i>r</i> value | -0.139   | -0.259* | 0.013    | -0.225** | -0.205** | 0.108    | -0.119   | 0.197*   | 0.229**  | -0.250** | -0.152*  | -0.003  | -0.168*  | 0.013    |
|            | <i>p</i> value | 0.183    | 0.044   | 0.829    | 0.000    | 0.001    | 0.076    | 0.051    | 0.028    | 0.000    | 0.000    | 0.003    | 0.173   | 0.739    | 0.981    |
| C16:0      | <i>r</i> value | 0.064    | 0.446** | 0.424**  | 0.650**  | 0.033    | 0.008    | 0.027    | -0.284** | -0.185** | 0.855**  | 0.520**  | 0.320** | -0.022   | 0.424**  |
|            | <i>p</i> value | 0.465    | 0.000   | 0.000    | 0.000    | 0.520    | 0.876    | 0.606    | 0.000    | 0.000    | 0.000    | 0.000    | 0.000   | 0.095    | 0.000    |
| C17:0      | <i>r</i> value | 0.159    | 0.000   | 0.000    | -0.005   | -0.114   | -0.070   | -0.135   | 0.001    | -0.083   | 0.062    | 0.010    | -0.022  | 0.030    | 0.000    |
|            | <i>p</i> value | 0.254    | 0.997   | 1.000    | 0.952    | 0.183    | 0.413    | 0.115    | 0.993    | 0.339    | 0.469    | 0.764    | 0.684   | 0.894    | 0.978    |
| C18:0      | <i>r</i> value | -0.064   | 0.371** | 0.116*   | 0.397**  | -0.012   | -0.193** | -0.105*  | -0.192*  | -0.384** | 0.646**  | 0.215**  | 0.189** | -0.145*  | 0.116*   |
|            | <i>p</i> value | 0.468    | 0.003   | 0.026    | 0.000    | 0.811    | 0.000    | 0.042    | 0.012    | 0.000    | 0.000    | 0.000    | 0.001   | 0.191    | 0.000    |
| C21:0      | <i>r</i> value | -0.249*  | -0.193  | -0.182   | -0.193   | -0.227*  | -0.254*  | -0.285*  | 0.127    | -0.034   | -0.053   | -0.080   | -0.199  | 0.223    | -0.182   |

|          |                |         |         |          |          |         |          |         |          |          |          |          |          |         |          |
|----------|----------------|---------|---------|----------|----------|---------|----------|---------|----------|----------|----------|----------|----------|---------|----------|
| C22:0    | <i>p</i> value | 0.037   | 0.679   | 0.110    | 0.087    | 0.043   | 0.025    | 0.010   | 0.329    | 0.765    | 0.644    | 0.394    | 0.318    | 0.108   | 0.130    |
|          | <i>r</i> value | -0.287  | -0.111  | -0.020   | -0.076   | 0.016   | 0.067    | 0.029   | 0.053    | 0.140    | -0.140   | 0.051    | -0.011   | 0.104   | -0.020   |
|          | <i>p</i> value | 0.095   | 0.681   | 0.879    | 0.566    | 0.902   | 0.615    | 0.826   | 0.767    | 0.289    | 0.289    | 0.945    | 0.565    | 0.236   | 0.758    |
| C23:0    | <i>r</i> value | -0.383  | 0.347** | 0.291**  | 0.408**  | -0.008  | -0.067   | -0.033  | -0.071   | -0.149*  | 0.500**  | 0.452**  | 0.199*   | 0.132   | 0.291**  |
|          | <i>p</i> value | 0.245   | 0.006   | 0.000    | 0.000    | 0.899   | 0.307    | 0.617   | 0.541    | 0.024    | 0.000    | 0.000    | 0.000    | 0.005   | 0.000    |
| C24:0    | <i>r</i> value | -0.327  | 0.180   | 0.036    | 0.110    | -0.084  | -0.134*  | -0.129  | 0.060    | 0.012    | 0.190**  | 0.296**  | 0.019    | 0.104   | 0.036    |
|          | <i>p</i> value | 0.300   | 0.165   | 0.598    | 0.102    | 0.216   | 0.047    | 0.056   | 0.613    | 0.857    | 0.005    | 0.000    | 0.328    | 0.204   | 0.433    |
| SFA      | <i>r</i> value | -0.055  | 0.449** | 0.422**  | 0.660**  | -0.011  | -0.045   | -0.035  | -0.045   | -0.011   | 0.883**  | 0.494**  | 0.332**  | -0.044  | 0.422**  |
|          | <i>p</i> value | 0.533   | 0.000   | 0.000    | 0.000    | 0.833   | 0.385    | 0.503   | 0.561    | 0.825    | 0.000    | 0.000    | 0.000    | 0.340   | 0.000    |
| C14:1    | <i>r</i> value | 0.115   | 0.416*  | 0.014    | 0.240**  | 0.311** | 0.040    | 0.296** | 0.058    | -0.054   | 0.131    | 0.033    | -0.016   | 0.003   | 0.014    |
|          | <i>p</i> value | 0.245   | 0.035   | 0.875    | 0.006    | 0.000   | 0.650    | 0.001   | 0.524    | 0.544    | 0.136    | 0.728    | 0.394    | 0.266   | 0.929    |
| C16:1    | <i>r</i> value | -0.062  | 0.053   | 0.119*   | 0.376**  | 0.371** | 0.078    | 0.359** | -0.291** | -0.074   | 0.277**  | 0.100    | 0.075    | -0.051  | 0.119*   |
|          | <i>p</i> value | 0.507   | 0.677   | 0.048    | 0.000    | 0.000   | 0.192    | 0.000   | 0.000    | 0.218    | 0.000    | 0.393    | 0.699    | 0.966   | 0.119    |
| C17:1    | <i>r</i> value | -0.038  | -0.147  | -0.261** | -0.229** | -0.031  | -0.176** | -0.103  | 0.078    | 0.074    | -0.230** | -0.236** | -0.255** | 0.082   | -0.261** |
|          | <i>p</i> value | 0.749   | 0.251   | 0.000    | 0.000    | 0.600   | 0.003    | 0.079   | 0.368    | 0.210    | 0.000    | 0.000    | 0.023    | 0.183   | 0.000    |
| C18:1n9t | <i>r</i> value | -0.137  | -0.154  | -0.156   | 0.071    | 0.508** | 0.035    | 0.465** | -0.032   | -0.042   | -0.091   | -0.071   | -0.128   | 0.117   | -0.156   |
|          | <i>p</i> value | 0.400   | 0.295   | 0.050    | 0.375    | 0.000   | 0.663    | 0.000   | 0.774    | 0.605    | 0.253    | 0.434    | 0.953    | 0.212   | 0.063    |
| C18:1n9c | <i>r</i> value | -0.029  | 0.309*  | 0.354**  | 0.854**  | 0.547** | 0.021    | 0.455** | -0.467** | -0.238** | 0.891**  | 0.443**  | 0.280**  | -0.035  | 0.354**  |
|          | <i>p</i> value | 0.746   | 0.013   | 0.000    | 0.000    | 0.000   | 0.688    | 0.000   | 0.000    | 0.000    | 0.000    | 0.000    | 0.000    | 0.447   | 0.000    |
| C20:1n9  | <i>r</i> value | 0.617** | 0.515** | 0.377**  | 0.333**  | 0.097   | 0.346**  | 0.242*  | -0.130   | -0.101   | 0.278**  | 0.421**  | 0.115    | -0.150  | 0.377**  |
|          | <i>p</i> value | 0.003   | 0.004   | 0.000    | 0.000    | 0.315   | 0.000    | 0.011   | 0.308    | 0.297    | 0.003    | 0.000    | 0.316    | 0.947   | 0.000    |
| C22:1n9  | <i>r</i> value | 0.210*  | 0.363   | -0.095   | -0.022   | 0.013   | -0.096   | -0.022  | 0.177    | 0.043    | -0.047   | -0.109   | -0.025   | 0.000   | -0.095   |
|          | <i>p</i> value | 0.035   | 0.377   | 0.334    | 0.823    | 0.895   | 0.329    | 0.824   | 0.070    | 0.670    | 0.635    | 0.195    | 0.161    | 0.461   | 0.105    |
| MUFA     | <i>r</i> value | 0.019   | 0.000   | 0.331**  | 0.933**  | 0.757** | 0.054    | 0.660** | -0.413** | -0.138** | 0.874**  | 0.416**  | 0.188**  | 0.078   | 0.331**  |
|          | <i>p</i> value | 0.833   | 0.999   | 0.000    | 0.000    | 0.000   | 0.295    | 0.000   | 0.000    | 0.007    | 0.000    | 0.000    | 0.000    | 0.254   | 0.000    |
| C18:2n6c | <i>r</i> value | 0.099   | 0.249*  | 0.775**  | 0.605**  | 0.074   | 0.535**  | 0.274** | -0.182*  | -0.108*  | 0.638**  | 0.955**  | 0.243**  | 0.159** | 0.775**  |

|         |                |         |          |          |          |          |          |          |          |          |          |          |         |          |          |
|---------|----------------|---------|----------|----------|----------|----------|----------|----------|----------|----------|----------|----------|---------|----------|----------|
| C18:3n3 | <i>p</i> value | 0.260   | 0.047    | 0.000    | 0.000    | 0.165    | 0.000    | 0.000    | 0.017    | 0.042    | 0.000    | 0.000    | 0.000   | 0.000    | 0.000    |
|         | <i>r</i> value | 0.104   | 0.183    | 0.461**  | 0.345**  | 0.037    | 0.360**  | 0.180**  | -0.138   | -0.097   | 0.365**  | 0.191**  | 0.899** | -0.624** | 0.461**  |
| C20:3n6 | <i>p</i> value | 0.262   | 0.265    | 0.000    | 0.000    | 0.553    | 0.000    | 0.004    | 0.137    | 0.121    | 0.000    | 0.001    | 0.000   | 0.000    | 0.000    |
|         | <i>r</i> value | 0.071   | 0.238    | 0.047    | -0.121   | -0.286** | -0.041   | -0.267** | 0.210    | -0.276** | 0.028    | 0.173    | -0.031  | 0.010    | 0.047    |
| C20:4n6 | <i>p</i> value | 0.664   | 0.096    | 0.653    | 0.246    | 0.005    | 0.695    | 0.009    | 0.061    | 0.007    | 0.788    | 0.266    | 0.733   | 0.270    | 0.941    |
|         | <i>r</i> value | 0.132   | -0.083   | 0.440**  | 0.350**  | 0.182*   | 0.374**  | 0.290**  | -0.017   | -0.161*  | 0.338**  | 0.509**  | 0.153*  | 0.078    | 0.440**  |
| C20:5n3 | <i>p</i> value | 0.143   | 0.742    | 0.000    | 0.000    | 0.017    | 0.000    | 0.000    | 0.856    | 0.037    | 0.000    | 0.000    | 0.541   | 0.050    | 0.001    |
|         | <i>r</i> value | 1.000   | -0.030   | 0.333**  | 0.126    | 0.039    | 0.344**  | 0.158    | -0.067   | -0.164   | 0.078    | 0.174*   | 0.366** | -0.236** | 0.333**  |
| C22:6n3 | <i>p</i> value |         | 0.955    | 0.000    | 0.148    | 0.656    | 0.000    | 0.070    | 0.502    | 0.063    | 0.377    | 0.203    | 0.262   | 0.489    | 0.090    |
|         | <i>r</i> value | -0.030  | 1.000    | 0.391**  | 0.125    | -0.295*  | 0.156    | -0.237   | 0.088    | -0.332** | 0.322**  | 0.100    | 0.462** | -0.513** | 0.391**  |
| PUFA    | <i>p</i> value | 0.955   |          | 0.001    | 0.322    | 0.017    | 0.215    | 0.057    | 0.572    | 0.007    | 0.009    | 0.098    | 0.265   | 0.603    | 0.001    |
|         | <i>r</i> value | 0.333** | 0.391**  | 1.000    | 0.641**  | 0.088    | 0.874**  | 0.457**  | -0.273** | 0.065    | 0.563**  | 0.857**  | 0.609** | -0.176** | 1.000**  |
| UFA     | <i>p</i> value | 0.000   | 0.001    |          | 0.000    | 0.089    | 0.000    | 0.000    | 0.000    | 0.210    | 0.000    | 0.000    | 0.000   | 0.015    | 0.000    |
|         | <i>r</i> value | 0.126   | 0.125    | 0.641**  | 1.000    | 0.648**  | 0.368**  | 0.713**  | -0.456** | -0.087   | 0.919**  | 0.635**  | 0.374** | 0.010    | 0.641**  |
| MUFA/SF | <i>p</i> value | 0.148   | 0.322    | 0.000    |          | 0.000    | 0.000    | 0.000    | 0.000    | 0.094    | 0.000    | 0.000    | 0.000   | 0.094    | 0.000    |
|         | <i>r</i> value | 0.039   | -0.295*  | 0.088    | 0.648**  | 1.000    | 0.116*   | 0.897**  | -0.409** | -0.141** | 0.392**  | 0.132*   | -0.019  | 0.131*   | 0.088    |
| A       | <i>p</i> value | 0.656   | 0.017    | 0.089    | 0.000    |          | 0.024    | 0.000    | 0.000    | 0.006    | 0.000    | 0.173    | 0.553   | 0.375    | 0.267    |
|         | <i>r</i> value | 0.344** | 0.156    | 0.874**  | 0.368**  | 0.116*   | 1.000    | 0.536**  | -0.288** | 0.071    | 0.172**  | 0.665**  | 0.494** | -0.174** | 0.874**  |
| PUFA/SF | <i>p</i> value | 0.000   | 0.215    | 0.000    | 0.000    | 0.024    |          | 0.000    | 0.000    | 0.171    | 0.001    | 0.000    | 0.000   | 0.037    | 0.000    |
|         | <i>r</i> value | 0.158   | -0.237   | 0.457**  | 0.713**  | 0.897**  | 0.536**  | 1.000    | -0.487** | -0.086   | 0.405**  | 0.379**  | 0.187** | 0.057    | 0.457**  |
| UFA/SFA | <i>p</i> value | 0.070   | 0.057    | 0.000    | 0.000    | 0.000    | 0.000    |          | 0.000    | 0.095    | 0.000    | 0.000    | 0.004   | 0.144    | 0.000    |
|         | <i>r</i> value | -0.067  | 0.088    | -0.273** | -0.456** | -0.409** | -0.288** | -0.487** | 1.000    | 0.261**  | -0.418** | -0.240** | -0.021  | -0.139   | -0.273** |
| SCFA    | <i>p</i> value | 0.502   | 0.572    | 0.000    | 0.000    | 0.000    | 0.000    | 0.000    |          | 0.001    | 0.000    | 0.008    | 0.137   | 0.377    | 0.002    |
|         | <i>r</i> value | -0.164  | -0.332** | 0.065    | -0.087   | -0.141** | 0.071    | -0.086   | 0.261**  | 1.000    | -0.162** | -0.047   | -0.038  | 0.040    | 0.065    |
| MCFA    | <i>p</i> value | 0.063   | 0.007    | 0.210    | 0.094    | 0.006    | 0.171    | 0.095    | 0.001    |          | 0.002    | 0.049    | 0.121   | 0.728    | 0.743    |
|         | <i>r</i> value | 0.078   | 0.322**  | 0.563**  | 0.919**  | 0.392**  | 0.172**  | 0.405**  | -0.418** | -0.162** | 1.000    | 0.606**  | 0.384** | -0.028   | 0.563**  |

|         |                |          |          |          |         |        |          |         |          |        |         |         |          |          |          |
|---------|----------------|----------|----------|----------|---------|--------|----------|---------|----------|--------|---------|---------|----------|----------|----------|
| n-6     | <i>p</i> value | 0.377    | 0.009    | 0.000    | 0.000   | 0.000  | 0.001    | 0.000   | 0.000    | 0.002  |         | 0.000   | 0.000    | 0.259    | 0.000    |
|         | <i>r</i> value | 0.174*   | 0.100    | 0.857**  | 0.635** | 0.132* | 0.665**  | 0.379** | -0.240** | -0.047 | 0.606** | 1.000   | 0.263**  | 0.179**  | 0.857**  |
|         | <i>p</i> value | 0.203    | 0.098    | 0.000    | 0.000   | 0.173  | 0.000    | 0.000   | 0.008    | 0.049  | 0.000   |         | 0.001    | 0.000    | 0.000    |
| n-3     | <i>r</i> value | 0.366**  | 0.462**  | 0.609**  | 0.374** | -0.019 | 0.494**  | 0.187** | -0.021   | -0.038 | 0.384** | 0.263** | 1.000    | -0.675** | 0.609**  |
|         | <i>p</i> value | 0.262    | 0.265    | 0.000    | 0.000   | 0.553  | 0.000    | 0.004   | 0.137    | 0.121  | 0.000   | 0.001   |          | 0.000    | 0.000    |
| n-6/n-3 | <i>r</i> value | -0.236** | -0.513** | -0.176** | 0.010   | 0.131* | -0.174** | 0.057   | -0.139   | 0.040  | -0.028  | 0.179** | -0.675** | 1.000    | -0.176** |
|         | <i>p</i> value | 0.489    | 0.603    | 0.015    | 0.094   | 0.375  | 0.037    | 0.144   | 0.377    | 0.728  | 0.259   | 0.000   | 0.000    |          | 0.593    |
| EFA     | <i>r</i> value | 0.333**  | 0.391**  | 1.000**  | 0.641** | 0.088  | 0.874**  | 0.457** | -0.273** | 0.065  | 0.563** | 0.857** | 0.609**  | -0.176** | 1.000    |
|         | <i>p</i> value | 0.090    | 0.001    | 0.000    | 0.000   | 0.267  | 0.000    | 0.000   | 0.002    | 0.743  | 0.000   | 0.000   | 0.000    | 0.593    |          |

Note: \* $p < 0.05$ , \*\* $p < 0.01$ .
