# Supplementary material for: Effects of the Expressions and Variants of the CAST Gene on the Fatty Acid Composition of the Longissimus Thoracis Muscle of Grazing Sonid Sheep
Source: MDPI journal article supplement (doi:10.3390/ani13020195), 2023-01-04
Supplement: s1 [file s1]

**Table S6.** Associations of *CAST* variants with fatty acid composition in longissimus thoracis muscles in Sonid sheep.

| Fatty acid<br>composition | c.1210C>T (R404C) |              |              | c.1437G>A in LD-M |              | c.2097C>T    |              |
|---------------------------|-------------------|--------------|--------------|-------------------|--------------|--------------|--------------|
|                           | Genotype          |              |              | Genotype          |              | Genotype     |              |
|                           | CC (253)          | CT (114)     | TT (11)      | GG (288)          | GA (84)      | CC (287)     | CT (89)      |
| C4:0                      | 1.84 ± 0.08       | 1.90 ± 0.12  | 1.83 ± 0.22  | 1.86 ± 0.07       | 1.83 ± 0.14  | 1.86 ± 0.07  | 1.77 ± 0.16  |
| C6:0                      | 0.85 ± 0.07       | 0.66 ± 0.08  | 0.64 ± 0.14  | 0.83 ± 0.07       | 0.74 ± 0.09  | 0.80 ± 0.06  | 0.67 ± 0.11  |
| C11:0                     | 0.46 ± 0.01       | 0.45 ± 0.02  | 0.51 ± 0.06  | 0.46 ± 0.01       | 0.45 ± 0.02  | 0.45 ± 0.01  | 0.47 ± 0.02  |
| C13:0                     | 0.64 ± 0.05       | 0.62 ± 0.07  | 0.64 ± 0.19  | 0.64 ± 0.04       | 0.63 ± 0.11  | 0.64 ± 0.04  | 0.61 ± 0.08  |
| C15:0                     | 0.75 ± 0.03       | 0.80 ± 0.04  | 0.94 ± 0.13  | 0.75 ± 0.02       | 0.82 ± 0.05  | 0.75 ± 0.02  | 0.83 ± 0.05  |
| C16:0                     | 17.05 ± 0.23      | 16.30 ± 0.28 | 18.10 ± 0.98 | 17.01 ± 0.21      | 16.30 ± 0.34 | 16.92 ± 0.20 | 16.67 ± 0.38 |
| C17:0                     | 0.69 ± 0.12       | 0.72 ± 0.07  | 0.74 ± 0.16  | 0.71 ± 0.10       | 0.69 ± 0.03  | 0.71 ± 0.09  | 0.67 ± 0.04  |
| C21:0                     | 0.54 ± 0.03       | 0.67 ± 0.22  | 0.52 ± 0.03  | 0.63 ± 0.08       | 0.59 ± 0.05  | 0.62 ± 0.08  | 0.50 ± 0.04  |
| C22:0                     | 0.65 ± 0.03       | 0.67 ± 0.06  | 0.72 ± 0.00  | 0.66 ± 0.03       | 0.58 ± 0.00  | 0.66 ± 0.03  | 0.54 ± 0.10  |
| C23:0                     | 0.57 ± 0.02       | 0.54 ± 0.02  | 0.57 ± 0.23  | 0.56 ± 0.01       | 0.56 ± 0.03  | 0.56 ± 0.01  | 0.55 ± 0.03  |
| C24:0                     | 0.53 ± 0.02       | 0.53 ± 0.02  | 0.49 ± 0.22  | 0.53 ± 0.02       | 0.54 ± 0.03  | 0.53 ± 0.02  | 0.54 ± 0.03  |
| C14:1                     | 0.77 ± 0.12       | 0.63 ± 0.06  | 0.50 ± 0.06  | 0.76 ± 0.11       | 0.67 ± 0.07  | 0.76 ± 0.10  | 0.52 ± 0.07  |
| C16:1                     | 0.97 ± 0.10       | 0.81 ± 0.03  | 0.91 ± 0.09  | 0.96 ± 0.08       | 0.79 ± 0.03  | 0.94 ± 0.08  | 0.85 ± 0.03  |
| C17:1                     | 0.73 ± 0.03       | 0.81 ± 0.03  | 0.70 ± 0.11  | 0.74 ± 0.03       | 0.83 ± 0.03  | 0.74 ± 0.03  | 0.81 ± 0.03  |
| C20:1n9                   | 0.70 ± 0.02       | 0.71 ± 0.02  | 0.69 ± 0.15  | 0.70 ± 0.02       | 0.71 ± 0.03  | 0.72 ± 0.02  | 0.65 ± 0.02  |
| C22:1n9                   | 0.55 ± 0.03       | 0.63 ± 0.04  | 0.54 ± 0.08  | 0.56 ± 0.03       | 0.63 ± 0.05  | 0.56 ± 0.03  | 0.62 ± 0.04  |
| MUFA                      | 21.62 ± 0.32      | 20.72 ± 0.41 | 21.23 ± 1.04 | 21.57 ± 0.30      | 20.70 ± 0.43 | 21.47 ± 0.30 | 21.02 ± 0.47 |
| C18:2n6c                  | 4.44 ± 0.07       | 4.53 ± 0.12  | 5.30 ± 0.29  | 4.43 ± 0.07       | 4.64 ± 0.15  | 4.44 ± 0.07  | 4.65 ± 0.15  |
| C20:3n6                   | 0.45 ± 0.02       | 0.45 ± 0.03  | 0.50 ± 0.05  | 0.45 ± 0.02       | 0.46 ± 0.03  | 0.45 ± 0.02  | 0.47 ± 0.04  |
| C20:4n6                   | 0.56 ± 0.04       | 0.49 ± 0.05  | 0.64 ± 0.08  | 0.55 ± 0.03       | 0.51 ± 0.05  | 0.54 ± 0.03  | 0.57 ± 0.06  |
| C20:5n3                   | 0.56 ± 0.03       | 0.55 ± 0.04  | 0.48 ± 0.10  | 0.55 ± 0.02       | 0.57 ± 0.05  | 0.57 ± 0.02  | 0.51 ± 0.04  |

|          |              |              |              |              |              |              |              |
|----------|--------------|--------------|--------------|--------------|--------------|--------------|--------------|
| C22:6n3  | 0.44 ± 0.02  | 0.41 ± 0.02  | 0.37 ± 0.00  | 0.44 ± 0.02  | 0.40 ± 0.03  | 0.44 ± 0.02  | 0.38 ± 0.03  |
| PUFA     | 8.21 ± 0.14  | 7.98 ± 0.20  | 8.80 ± 0.64  | 8.16 ± 0.13  | 8.11 ± 0.26  | 8.19 ± 0.13  | 8.11 ± 0.26  |
| UFA      | 29.83 ± 0.39 | 28.70 ± 0.51 | 30.03 ± 1.52 | 29.73 ± 0.37 | 28.81 ± 0.57 | 29.66 ± 0.36 | 29.13 ± 0.62 |
| MUFA/SFA | 0.60 ± 0.01  | 0.60 ± 0.01  | 0.58 ± 0.03  | 0.60 ± 0.01  | 0.60 ± 0.01  | 0.60 ± 0.01  | 0.60 ± 0.01  |
| PUFA/SFA | 0.23 ± 0.00  | 0.23 ± 0.01  | 0.24 ± 0.02  | 0.23 ± 0.00  | 0.24 ± 0.01  | 0.23 ± 0.00  | 0.23 ± 0.01  |
| UFA/SFA  | 0.83 ± 0.01  | 0.82 ± 0.01  | 0.82 ± 0.05  | 0.82 ± 0.01  | 0.84 ± 0.02  | 0.83 ± 0.01  | 0.83 ± 0.02  |
| SCFA     | 1.84 ± 0.08  | 1.90 ± 0.12  | 1.83 ± 0.22  | 1.86 ± 0.07  | 1.83 ± 0.14  | 1.86 ± 0.07  | 1.77 ± 0.16  |
| MCFA     | 2.06 ± 0.04  | 2.04 ± 0.05  | 2.02 ± 0.15  | 2.07 ± 0.03  | 2.11 ± 0.06  | 2.03 ± 0.03  | 2.08 ± 0.06  |
| LCFA     | 62.05 ± 0.68 | 59.55 ± 0.86 | 63.02 ± 2.44 | 62.02 ± 0.63 | 59.32 ± 0.97 | 61.68 ± 0.61 | 60.32 ± 1.12 |
| EFA      | 8.21 ± 0.14  | 7.98 ± 0.20  | 8.80 ± 0.64  | 8.16 ± 0.13  | 8.11 ± 0.26  | 8.19 ± 0.13  | 8.11 ± 0.26  |

---

Note: Values are shown as the means ± standard error.
